# Supplementary material for: Electrodeposited NaYF4:Yb3+, Er3+ up-conversion films for flexible neural device construction and near-infrared optogenetics
Source: Royal Society of Chemistry journal article supplement (doi:10.1039/d2tb02665a), 2023-01-01
Supplement: d2tb02665a1.pdf [file d2tb02665a1.pdf]

**Electronic Supplementary Material (ESI) for  
Journal of Materials Chemistry B**

**Electrodeposited NaYF<sub>4</sub>: Yb<sup>3+</sup>, Er<sup>3+</sup> up-conversion films for flexible  
neural device construction and near-infrared optogenetics**

Xuran Zhang<sup>a,b,c,‡</sup>, Jianfei Ding<sup>a</sup>, Liang Zou<sup>a,b,c</sup>, Huihui Tian<sup>a</sup>, Ying Fang<sup>a,b,c,d,\*</sup>, Jinfen  
Wang<sup>a,‡,\*</sup>

<sup>a</sup>CAS Center for Excellence in Nanoscience, National Center for Nanoscience and  
Technology, Beijing 100190, China, wangjinfen@nanoctr.cn, fangy@nanoctr.cn

<sup>b</sup>CAS Center for Excellence in Brain Science and Intelligence Technology, Institute of  
Neuroscience, Chinese Academy of Sciences, Shanghai 200031, China

<sup>c</sup>University of Chinese Academy of Sciences, Beijing 100049, China

<sup>d</sup>Chinese Institute for Brain Research, Beijing, 102206, China

<sup>‡</sup>These authors contributed equally to this work.

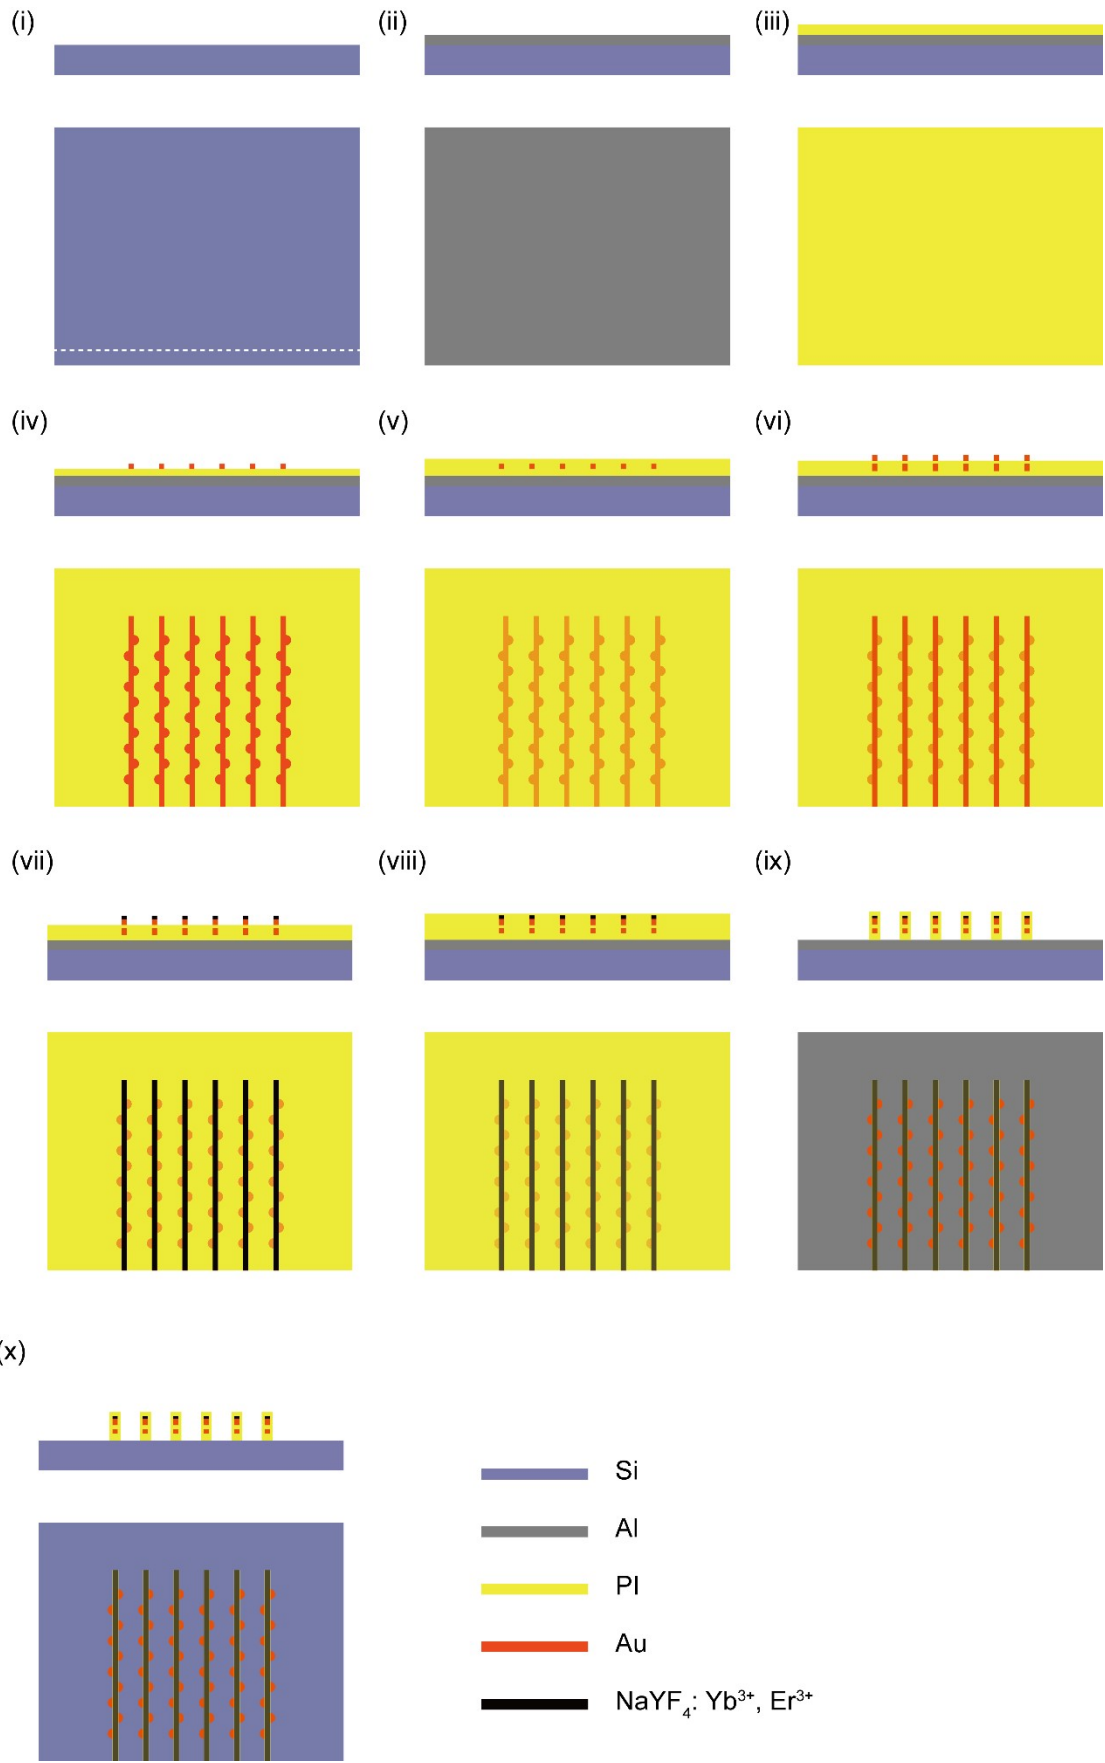

**Figure S1.** Schematics of flexible device fabrication process. (i) Silicon substrate. The side view corresponds to the position of the white dotted line. (ii) Deposition of aluminum sacrifice layer. (iii) Spin-coating of bottom PI layer. (iv) Deposition and patterning of gold layer for filament and microelectrodes. (v) Spin-coating of middle PI layer. (vi) Patterning and deposition of gold layer for electrodeposition of NaYF<sub>4</sub>: Yb<sup>3+</sup>, Er<sup>3+</sup> film. (vii) Electrodeposition of NaYF<sub>4</sub>: Yb<sup>3+</sup>, Er<sup>3+</sup> film. (viii) Spin-coating of top PI layer. (ix) RIE patterning of PI to form the flexible device and expose the recording sites. (x) Etching of aluminum to release the flexible device.

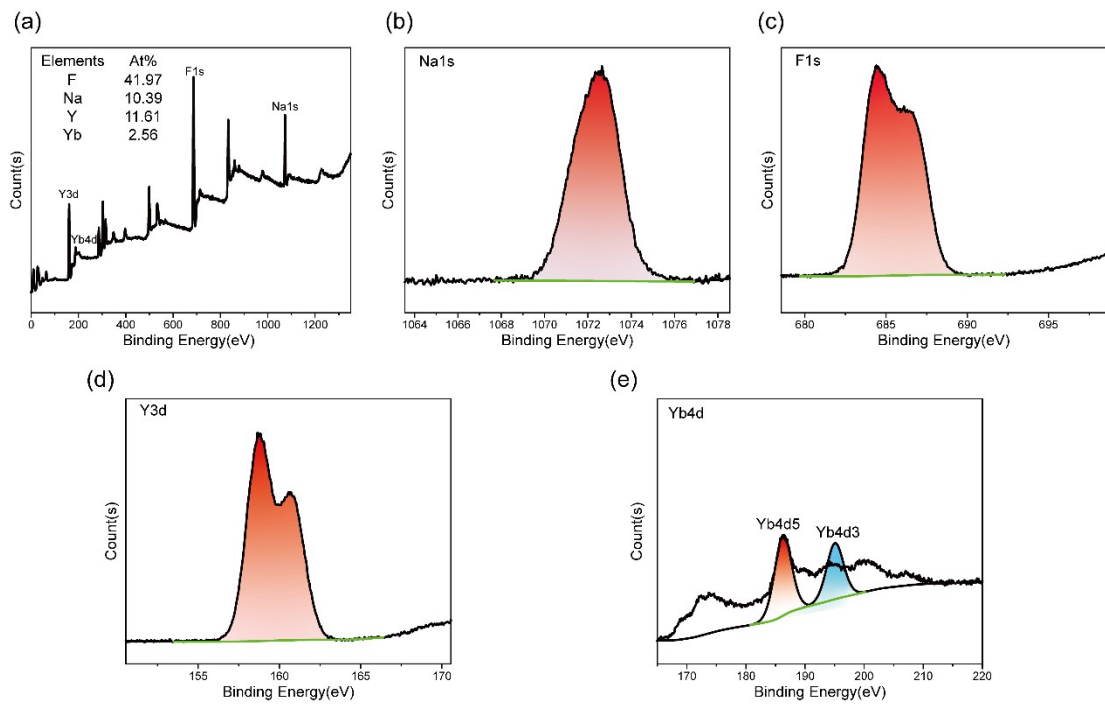

**Figure S2.** XPS spectrum of NaYF<sub>4</sub>: Yb<sup>3+</sup>, Er<sup>3+</sup> film. (a) XPS survey spectrum of NaYF<sub>4</sub>: Yb<sup>3+</sup>, Er<sup>3+</sup> film. (b) Local spectra for Na 1s analyses of NaYF<sub>4</sub>: Yb<sup>3+</sup>, Er<sup>3+</sup> film. (c) Local spectra for F 1s analyses of NaYF<sub>4</sub>: Yb<sup>3+</sup>, Er<sup>3+</sup> film. (d) Local spectra for Y 3d analyses of NaYF<sub>4</sub>: Yb<sup>3+</sup>, Er<sup>3+</sup> film. (e) Local spectra for Yb 4d analyses of NaYF<sub>4</sub>: Yb<sup>3+</sup>, Er<sup>3+</sup> film.

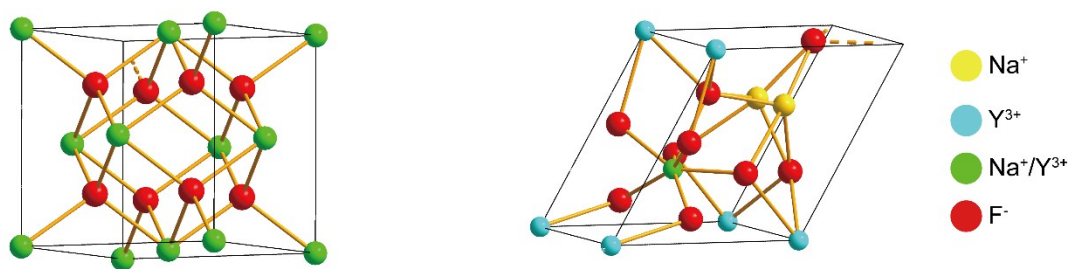

**Figure S3.** Schematic diagram of crystal structure of  $\alpha$ -NaYF<sub>4</sub> (Left) and  $\beta$ -NaYF<sub>4</sub> (Right).

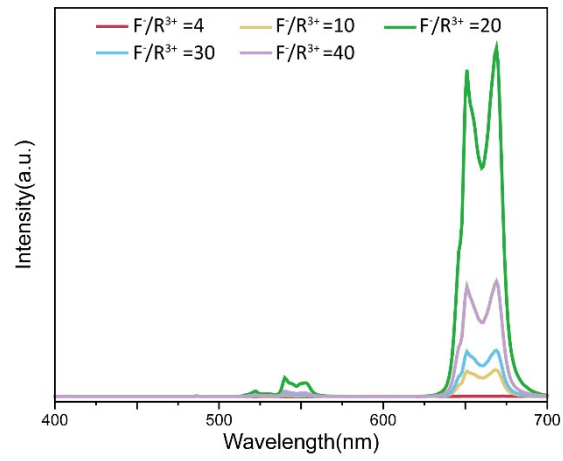

**Figure S4.** Fluorescence spectra in visible spectrum of UC films prepared at different  $F/R^{3+}$  ratios on the ITO substrate.

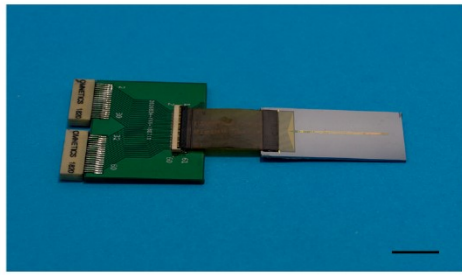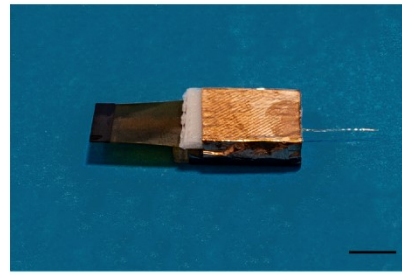

**Figure S5.** Photographs of a flip chip-bonded flexible neural device connected to a custom-designed PCB (Left, scale bar, 10 mm), and a self-assembled and packaged flexible neural device (Right, scale bar, 10 mm).

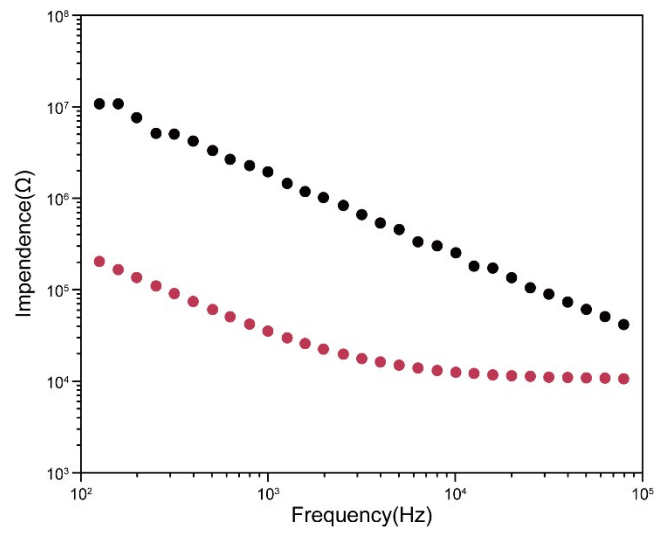

**Figure S6.** EIS of a recording site before (black) and after (red) nano-sized platinum electrodeposition.
